# Supplementary material for: Characterisation of patients with severe asthma in the UK Severe Asthma Registry in the biologic era
Source: HighWire-hosted journal article supplement (doi:10.1136/thoraxjnl-2020-215168), 2020-12-09
Supplement: thoraxjnl-2020-215168supp001_data_supplement.pdf [file thoraxjnl-2020-215168supp001_data_supplement.pdf]

**Characterisation of patients with severe asthma in the UK Severe Asthma Registry in the biologic era**

**Appendix 1 - List of UK Severe Networks and Network Leads in UKSAR (2020)**

| <b>Lead Centre &amp; Data Collection Centres</b>             | <b>Lead Clinician</b>                |
|--------------------------------------------------------------|--------------------------------------|
| <b>Belfast City Hospital</b>                                 | <b>Professor Liam Heaney</b>         |
| <b>Royal Brompton and Harefield NHS Trust</b>                |                                      |
| St Georges University Hospital NHS Trust                     | Professor A Menzies-Gow              |
| <b>Birmingham Regional Severe Asthma Service</b>             |                                      |
| University Hospitals Birmingham NHS Trust                    | Dr Adel Mansur                       |
| Sandwell & West Birmingham NHS Trust                         | Dr Adeel Sahal                       |
| Royal Wolverhampton NHS Trust                                | Dr Rachid Berair                     |
| Queen Elizabeth Hospital Birmingham                          | Dr Duncan Wilson                     |
| University Hospitals of Derby & Bunton NHS                   | Dr Deepak Subramanian                |
| The Dudley Group NHS Foundation Trust                        | Dr Martin Doherty                    |
| Worcestershire Acute Hospitals NHS Trust                     | Dr Bethan Barker                     |
| Gloucestershire Hospitals NHS Trust                          | Dr Simon Message                     |
| <b>South Thames and Kent Severe Asthma Network</b>           |                                      |
| Guy's & St Thomas' NHS Trust                                 | Dr David Jackson                     |
| <b>North Central &amp; East London Severe Asthma Service</b> |                                      |
| Bart's Health NHS Trust                                      | Dr Paul Pfeffer                      |
| Royal Free London NHS Trust                                  | Dr Paul Dilworth                     |
| Homerton University Hospital NHS Trust                       | Prof Raja Rajakulasingham            |
| <b>East Midlands Severe Asthma Network</b>                   |                                      |
| University Hospitals of Leicester NHS Trust                  | Professor Salman Siddiqui            |
| Nottingham University Hospital NHS Trust                     | Dr Sherif Gonem                      |
| <b>North West Midlands Severe Asthma Service</b>             |                                      |
| University Hospitals of North Midlands NHS Trust             | Dr Elfatih Idris                     |
| <b>Yorkshire Asthma MDT (Yorkshire/Hull/Leeds)</b>           |                                      |
| Sheffield Teaching Hospitals NHS Trust                       | Professor Ian Sabroe                 |
| Hull University Teaching Hospitals NHS Trust                 | Dr Shoaib Faruqi                     |
| The Leeds Teaching Hospitals NHS Trust                       | Dr Ian Clifton                       |
| Chesterfield Royal Hospital                                  | Dr Sally Davies                      |
| Doncaster Royal Infirmary                                    | Dr Aldrin Adeni & Dr Trevor Rogers   |
| Wakefield & Dewsbury Hospital                                | Dr James McCreanor & Dr Llinos Jones |
| Bradford Royal Infirmary                                     | Dr Dinesh Saralaya                   |
| North Lincolnshire & Goole                                   | Dr Umesh Bangalore Lakshminarayana   |

|                                              |                             |
|----------------------------------------------|-----------------------------|
| York District Hospital                       | Dr Rebecca Thomas           |
| Airedale Hospital                            | Dr Su Ann Leong             |
| Grimsby Hospital                             | Dr Madhav Menon             |
| Harrogate Hospital                           | Dr Claire Taylor            |
| Barnsley District General Hospital           | Dr Hazim Madhi              |
| Calderdale Hospital                          | Dr Johnnie Walker           |
| <b>East of England Severe Asthma Network</b> |                             |
| Cambridge University Hospitals NHS Trust     | <b>Dr Robin Gore</b>        |
| <b>Wessex Network</b>                        |                             |
| University Hospital Southampton NHS Trust    | <b>Dr Paddy Dennison</b>    |
| Portsmouth Hospitals NHS Trust               | <b>Dr Thomas Browne</b>     |
| Oxford University Hospitals NHS Trust        | <b>Professor Ian Pavord</b> |
| Churchill Hospital                           | Dr Henry Bettinson          |
| <b>South West Asthma Network</b>             |                             |
| University Hospitals Plymouth NHS Trust      | Dr Mitesh Patel             |
| University Hospitals Bristol NHS Trust       | Dr James Dodd               |
| Royal Devon & Exeter NHS Trust               | Dr Matthew Masoli           |
| Taunton & Somerset NHS Trust                 | Dr Robert Stone             |
| <b>North West Network</b>                    |                             |
| Wythenshawe Hospital                         | Dr Rob Niven                |
| Liverpool Royal Infirmary                    | Dr Hassan Burhan            |
| Salford Royal                                | Dr Ronan O'Driscoll         |
| Countess of Chester Hospital                 | Dr Stephen Scott            |
| Royal Albert Edward Infirmary Wigan          | Dr Imran Aziz               |
| Lancashire Teaching Hospital                 | Dr Aashish Vyas             |
| North Manchester General Hospital            | Dr Nita Seghal              |
| Wirral University Teaching Hospital          | Dr John Corless             |
| Royal Preston Hospital                       | Dr Aashish Vyas             |
| <b>Newcastle Severe Asthma Network</b>       |                             |
| Newcastle Upon Tyne NHS Trust                | <b>Dr Simon Doe</b>         |
| Freeman Hospital                             | Dr Andrew Stanton           |
| <b>NHS Greater Glasgow &amp; Clyde</b>       |                             |
| Gartnavel General Hospital                   | Dr Rekha Chaudhuri          |

**Appendix 2: List of Fields collected at baseline (fields in red have been added from June 2020)**

| <b>Variable</b>                             | <b>Type</b>      | <b>Responses</b>                                                     |
|---------------------------------------------|------------------|----------------------------------------------------------------------|
| <b>Identifiers</b>                          |                  |                                                                      |
| Date First Seen                             | Date             |                                                                      |
| Patient ID                                  | Numerical        | <i>Automatically generated unique UKSAR registration number</i>      |
| <b>Patient Demographics</b>                 |                  |                                                                      |
| Gender                                      | Categorical      | Female; Male                                                         |
| Age At First Assessment (Years)             | Numerical        |                                                                      |
| Ethnicity                                   | Categorical      | Caucasian; South East Asian; North East Asian; African; Mixed; Other |
| Occupational Cause or Worsening of Asthma   | Categorical      | No; Yes                                                              |
| Height (m)                                  | Numerical        |                                                                      |
| Weight (kg)                                 | Numerical        |                                                                      |
| BSA (m <sup>2</sup> )                       | Numerical        | <i>Calculated dependent field</i>                                    |
| BMI (kg/m <sup>2</sup> )                    | Numerical        | <i>Calculated dependent field</i>                                    |
| <b>Index of Multiple Deprivation</b>        | <b>Numerical</b> |                                                                      |
| Bronchial Thermoplasty Patient              | Categorical      | No; Yes                                                              |
| Research Patient                            | Categorical      | No; Yes                                                              |
| Initial Data Complete                       | Categorical      | No; Yes                                                              |
| <b>Medical History</b>                      |                  |                                                                      |
| Rescue Steroids In Last Year                | Numerical        |                                                                      |
| Invasive Ventilation Events Ever            | Numerical        |                                                                      |
| A&E Attendances For Asthma In Last Year     | Numerical        |                                                                      |
| Hospital Admissions For Asthma In Last Year | Numerical        |                                                                      |
| Age at Onset of Symptoms (Years)            | Numerical        |                                                                      |
| Smoking Status                              | Categorical      | Never smoked; Ex-smoker; Current smoker                              |
| Pack Years                                  | Numerical        |                                                                      |

|                                                                        |                    |                                   |
|------------------------------------------------------------------------|--------------------|-----------------------------------|
| Years Since Last Smoked                                                | Numerical          |                                   |
| <b>Nasal Polyps</b>                                                    | <b>Categorical</b> | <b>No; Yes</b>                    |
| Atopic Disease                                                         | Categorical        | No; Yes                           |
| Atopic Disease Description                                             | Free-text          |                                   |
| <b>Current Atopic Eczema</b>                                           | <b>Categorical</b> | <b>No; Yes</b>                    |
| Other Comorbidity                                                      | Categorical        | No; Cardiac disease; Other        |
| Comorbidity Description                                                | Free-text          |                                   |
| <b>Investigations</b>                                                  |                    |                                   |
| Blood Eosinophil Count (N/109L)                                        | Numerical          |                                   |
| Highest Blood Eosinophil Count [in available medical records] (N/109L) | Numerical          |                                   |
| Date Highest Eosinophil Count                                          | Date               |                                   |
| IgE (IU/mL)                                                            | Numerical          |                                   |
| Prior Highest Sputum Eosinophils (%)                                   | Numerical          |                                   |
| CT Scan                                                                | Categorical        | Not done; Normal; Abnormal        |
| Abnormal CT Scan Details                                               | Free-text          |                                   |
| Date Of Bone Densitometry                                              | Date               |                                   |
| Spinal Bone Density (T-Score)                                          | Numerical          |                                   |
| Femoral Neck Bone Density (T-Score)                                    | Numerical          |                                   |
| Additional Clinical Tests                                              | Free-text          |                                   |
| <b>Lung Function</b>                                                   |                    |                                   |
| FEV1 (L)                                                               | Numerical          |                                   |
| Predicted FEV1 (L)                                                     | Numerical          | <i>Calculated dependent field</i> |
| FEV1 (% Predicted)                                                     | Numerical          | <i>Calculated dependent field</i> |
| Post-BD FEV1 (L)                                                       | Numerical          |                                   |
| Post -BD FEV1 (% Predicted)                                            | Numerical          | <i>Calculated dependent field</i> |
| FVC (L)                                                                | Numerical          |                                   |
| Predicted FVC (L)                                                      | Numerical          | <i>Calculated dependent field</i> |

|                                       |             |                                                                                                                                          |
|---------------------------------------|-------------|------------------------------------------------------------------------------------------------------------------------------------------|
| FVC (% Predicted)                     | Numerical   | <i>Calculated dependent field</i>                                                                                                        |
| Post-BD FVC (L)                       | Numerical   |                                                                                                                                          |
| Post-BD FVC (% Predicted)             | Numerical   | <i>Calculated dependent field</i>                                                                                                        |
| FEV1/FVC                              | Numerical   | <i>Calculated dependent field</i>                                                                                                        |
| Post-BD FEV1/FVC                      | Numerical   | <i>Calculated dependent field</i>                                                                                                        |
| Residual Volume (% Predicted)         | Numerical   |                                                                                                                                          |
| Total Lung Capacity (% Predicted)     | Numerical   |                                                                                                                                          |
| KCO (% Predicted)                     | Numerical   |                                                                                                                                          |
| PC20 Methacholine / Histamine (mg/mL) | Numerical   |                                                                                                                                          |
| Date of PC20 Methacholine / Histamine | Date        |                                                                                                                                          |
| FeNO (ppb)                            | Numerical   |                                                                                                                                          |
| FeNO Date                             | Date        |                                                                                                                                          |
| <b>Allergen Testing</b>               |             |                                                                                                                                          |
| Environmental Allergen Test           | Categorical | No; RAST; SPT                                                                                                                            |
| RAST Positive                         | Categorical | No; Yes                                                                                                                                  |
| SPT Positive                          | Categorical | No; Yes                                                                                                                                  |
| Positive to Perennial Allergen        | Categorical | No; Yes                                                                                                                                  |
| Perennial Allergen Details            | Free-text   |                                                                                                                                          |
| <b>Asthma Control Questionnaire</b>   |             |                                                                                                                                          |
| ACQ1 Woken at Night                   | Categorical | Never; Hardly ever; A few times; Several times; Many times; A great many times; Unable to sleep because of asthma                        |
| ACQ2 Symptoms in Morning              | Categorical | No symptoms; Very mild symptoms; Mild symptoms; Moderate symptoms; Quite severe symptoms; Severe symptoms; Very severe symptoms          |
| ACQ3 Limited in Activities            | Categorical | Not limited at all; Very slightly limited; Slightly limited; Moderately limited; Very limited; Extremely limited; Totally limited        |
| ACQ4 Shortness of Breath              | Categorical | None; A very little; A little; A moderate amount; Quite a lot; A great deal; A very great deal                                           |
| ACQ5 Wheezing                         | Categorical | Never; Hardly any of the time; A little of the time; A moderate amount of the time; A lot of the time; Most of the time; All of the time |

|                                                                  |                    |                                                                                                                                                                                                                                               |
|------------------------------------------------------------------|--------------------|-----------------------------------------------------------------------------------------------------------------------------------------------------------------------------------------------------------------------------------------------|
| ACQ6 Puffs of SABA                                               | Categorical        | None; 1 - 2 puffs/inhalations most days; 3 - 4 puffs/inhalations most days; 5 - 8 puffs/inhalations most days; 9 - 12 puffs/inhalations most days; 13 - 16 puffs/inhalations most days; More than 16 puffs/inhalations most days              |
| ACQ7 FEV1                                                        | Categorical        | > 95% predicted; 95 - 90%; 89 - 80%; 79 - 70%; 69 - 60%; 59 - 50%; < 50%                                                                                                                                                                      |
| ACQ6 Score                                                       | Numerical          | <i>Calculated dependent field</i>                                                                                                                                                                                                             |
| ACQ7 Score                                                       | Numerical          | <i>Calculated dependent field</i>                                                                                                                                                                                                             |
| <b>EuroQoL Questionnaire</b>                                     |                    |                                                                                                                                                                                                                                               |
| EuroQoL Mobility                                                 | Categorical        | I have no problems in walking about; I have slight problems in walking about; I have moderate problems in walking about; I have severe problems in walking about; I am unable to walk about                                                   |
| EuroQoL Self-care                                                | Categorical        | I have no problems washing or dressing myself; I have slight problems washing or dressing myself; I have moderate problems washing or dressing myself; I have severe problems washing or dressing myself; I am unable to wash or dress myself |
| EuroQoL Usual Activities                                         | Categorical        | I have no problems doing my usual activities; I have slight problems doing my usual activities; I have moderate problems doing my usual activities; I have severe problems doing my usual activities; I am unable to do my usual activities   |
| EuroQoL Pain / Discomfort                                        | Categorical        | I have no pain or discomfort; I have slight pain or discomfort; I have moderate pain or discomfort; I have severe pain or discomfort; I have extreme pain or discomfort                                                                       |
| EuroQoL Anxiety / Depression                                     | Categorical        | I am not anxious or depressed; I am slightly anxious or depressed; I am moderately anxious or depressed; I am severely anxious or depressed; I am extremely anxious or depressed                                                              |
| EuroQoL Health Scale                                             | Numerical          |                                                                                                                                                                                                                                               |
| <b>Mini-AQLQ Questionnaire</b>                                   |                    |                                                                                                                                                                                                                                               |
| <b>Feel SHORT OF BREATH as a result of your asthma</b>           | <b>Categorical</b> | <b>All of the Time; Most of the Time; A Good Bit of the Time; Some of the Time; A Little of the Time; Hardly Any of the Time; None of the Time</b>                                                                                            |
| <b>Feel bothered by or have to AVOID DUST in the environment</b> | <b>Categorical</b> | <b>All of the Time; Most of the Time; A Good Bit of the Time; Some of the Time; A Little of the Time; Hardly Any of the Time; None of the Time</b>                                                                                            |
| <b>Feel FRUSTRATED as a result of your asthma</b>                | <b>Categorical</b> | <b>All of the Time; Most of the Time; A Good Bit of the Time; Some of the Time; A Little of the Time; Hardly Any of the Time; None of the Time</b>                                                                                            |

|                                                                                                                                                                        |             |                                                                                                                                             |
|------------------------------------------------------------------------------------------------------------------------------------------------------------------------|-------------|---------------------------------------------------------------------------------------------------------------------------------------------|
| Feel bothered by <b>COUGHING</b>                                                                                                                                       | Categorical | All of the Time; Most of the Time; A Good Bit of the Time; Some of the Time; A Little of the Time; Hardly Any of the Time; None of the Time |
| Feel <b>AFRAID OF NOT HAVING YOUR ASTHMA MEDICATION AVAILABLE</b>                                                                                                      | Categorical | All of the Time; Most of the Time; A Good Bit of the Time; Some of the Time; A Little of the Time; Hardly Any of the Time; None of the Time |
| Experience a feeling of <b>CHEST TIGHTNESS or CHEST HEAVINESS</b>                                                                                                      | Categorical | All of the Time; Most of the Time; A Good Bit of the Time; Some of the Time; A Little of the Time; Hardly Any of the Time; None of the Time |
| Feel bothered by or have to <b>AVOID CIGARETTE SMOKE</b> in the environment                                                                                            | Categorical | All of the Time; Most of the Time; A Good Bit of the Time; Some of the Time; A Little of the Time; Hardly Any of the Time; None of the Time |
| Have <b>DIFFICULTY GETTING A GOOD NIGHT'S SLEEP</b> as a result of your asthma                                                                                         | Categorical | All of the Time; Most of the Time; A Good Bit of the Time; Some of the Time; A Little of the Time; Hardly Any of the Time; None of the Time |
| Feel <b>CONCERNED ABOUT HAVING ASTHMA</b>                                                                                                                              | Categorical | All of the Time; Most of the Time; A Good Bit of the Time; Some of the Time; A Little of the Time; Hardly Any of the Time; None of the Time |
| Experience a <b>WHEEZE</b> in your chest                                                                                                                               | Categorical | All of the Time; Most of the Time; A Good Bit of the Time; Some of the Time; A Little of the Time; Hardly Any of the Time; None of the Time |
| Feel bothered by or have to <b>AVOID</b> going outside because of <b>WEATHER OR AIR STRENUOUS ACTIVITIES</b> (such as hurrying, exercising, running up stairs, sports) | Categorical | Totally Limited; Extremely Limited; Very Limited; Moderate Limitation; Some Limitation; A Little Limitation; Not at all Limited             |
| <b>MODERATE ACTIVITIES</b> (such as walking, housework, gardening, shopping, climbing stairs)                                                                          | Categorical | Totally Limited; Extremely Limited; Very Limited; Moderate Limitation; Some Limitation; A Little Limitation; Not at all Limited             |
| <b>SOCIAL ACTIVITIES</b> (such as talking, playing with pets/children, visiting friends/relatives)                                                                     | Categorical | Totally Limited; Extremely Limited; Very Limited; Moderate Limitation; Some Limitation; A Little Limitation; Not at all Limited             |
| <b>WORK-RELATED ACTIVITIES</b> (tasks you have do to at work)                                                                                                          | Categorical | Totally Limited; Extremely Limited; Very Limited; Moderate Limitation; Some Limitation; A Little Limitation; Not at all Limited             |
| <b>Asthma Medication</b>                                                                                                                                               |             |                                                                                                                                             |
| Maintenance OCS                                                                                                                                                        | Categorical | No; Yes                                                                                                                                     |
| Maintenance OCS (mg)                                                                                                                                                   | Numerical   |                                                                                                                                             |
| ICS                                                                                                                                                                    | Categorical | No; Yes                                                                                                                                     |
| ICS Dose (BDP equivalent/ug)                                                                                                                                           | Numerical   |                                                                                                                                             |

|                                                  |             |                                                                                                                                                                                                                                    |
|--------------------------------------------------|-------------|------------------------------------------------------------------------------------------------------------------------------------------------------------------------------------------------------------------------------------|
| Steroid Sparing Medication                       | Categorical | No; Yes                                                                                                                                                                                                                            |
| Steroid Sparing Medication Name                  | Free-text   |                                                                                                                                                                                                                                    |
| <b>Prior Biologic Therapy</b>                    | Categorical | No; Yes                                                                                                                                                                                                                            |
| Theophylline                                     | Categorical | No; Yes                                                                                                                                                                                                                            |
| Theophylline Level (mg/L)                        | Numerical   |                                                                                                                                                                                                                                    |
| SABA                                             | Categorical | No; Yes                                                                                                                                                                                                                            |
| LABA                                             | Categorical | No; Yes                                                                                                                                                                                                                            |
| LABA Name                                        | Free-text   |                                                                                                                                                                                                                                    |
| LAMA                                             | Categorical | No; Yes                                                                                                                                                                                                                            |
| LAMA Name                                        | Free-text   |                                                                                                                                                                                                                                    |
| Leukotriene Receptor Antagonists                 | Categorical | No; Yes                                                                                                                                                                                                                            |
| Maintenance Macrolides                           | Categorical | No; Yes                                                                                                                                                                                                                            |
| Nebuliser                                        | Categorical | No; Yes                                                                                                                                                                                                                            |
| Evidence Of Poor Adherence                       | Categorical | No; Prescription records; Objective measures; Clinical impression                                                                                                                                                                  |
| % Expected ICS Prescriptions Filled              | Numerical   |                                                                                                                                                                                                                                    |
| Prednisolone Level Measured                      | Categorical | No; Yes (2-4 hours); Yes (>4 hours)                                                                                                                                                                                                |
| Prednisolone Level (ng/L)                        | Numerical   |                                                                                                                                                                                                                                    |
| FeNO Suppression                                 | Categorical | Not done; Negative; Positive                                                                                                                                                                                                       |
| <b>Systematic Assessment and Management Plan</b> |             |                                                                                                                                                                                                                                    |
| ERS/ATS Severe Asthma                            | Categorical | No; Yes; Currently being assessed                                                                                                                                                                                                  |
| Other Factors Contributing To Symptoms           | Free-text   |                                                                                                                                                                                                                                    |
| Patient Is Adherent With Treatment               | Categorical | No; Yes                                                                                                                                                                                                                            |
| Management Plan                                  | Categorical | Discharge to local service; Optimisation of current treatment; Biologic therapy; Bronchial thermoplasty; Maintenance oral corticosteroids; Steroid sparing agent; Enter into clinical trial; <b>Adherence intervention</b> ; Other |
| Biologic Therapy Details                         | Free-text   |                                                                                                                                                                                                                                    |
| Steroid Sparing Details                          | Free-text   |                                                                                                                                                                                                                                    |
| Trial Details                                    | Free-text   |                                                                                                                                                                                                                                    |
| Other Management Plan                            | Free-text   |                                                                                                                                                                                                                                    |



## Appendix 3: List of Fields collected at follow-up (fields in red have been added from June 2020)

| Variable                                                   | Type        | Responses                                                                           |
|------------------------------------------------------------|-------------|-------------------------------------------------------------------------------------|
| <b>Identifiers</b>                                         |             |                                                                                     |
| Date Seen                                                  | Date        |                                                                                     |
| Patient ID                                                 | Numerical   | <i>Automatically generated unique UKSAR registration number</i>                     |
| <b>Summary</b>                                             |             |                                                                                     |
| Clinical Summary                                           | Free-text   |                                                                                     |
| Maintenance OCS                                            | Categorical | No; Yes                                                                             |
| Maintenance OCS (mg)                                       | Numerical   |                                                                                     |
| Biologic / SS <sup>a</sup>                                 | Categorical | No; Biologic; Steroid sparing agent                                                 |
| Biologic Therapy Details                                   | Free-text   |                                                                                     |
| Biologic / SS <sup>a</sup> Stopped or Changed              | Categorical | No; Yes                                                                             |
| Reason Biologic / SS <sup>a</sup> Stopped or Changed       | Categorical | Failed clinical response; Other reason                                              |
| Other Reason Biologic / SS <sup>a</sup> Stopped or Changed | Free-text   |                                                                                     |
| Maintenance Macrolides                                     | Categorical | No; Yes                                                                             |
| Rescue Steroids In Last Year                               | Numerical   |                                                                                     |
| A&E Attendances For Asthma In Last Year                    | Numerical   |                                                                                     |
| Hospital Admissions For Asthma In Last Year                | Numerical   |                                                                                     |
| Height (m)                                                 | Numerical   |                                                                                     |
| Weight (kg)                                                | Numerical   |                                                                                     |
| Fat Free Mass (%)                                          | Numerical   |                                                                                     |
| BMI (kg/m <sup>2</sup> )                                   | Numerical   | <i>Calculated dependent field</i>                                                   |
| BSA (m <sup>2</sup> )                                      | Numerical   | <i>Calculated dependent field</i>                                                   |
| ERS/ATS Severe Asthma                                      | Categorical | No; Yes                                                                             |
| Serious Medical Event Since Last Entry                     | Categorical | None; Anaphylaxis; Severe infection; Malignancy; MI / CVA; <b>Pregnancy</b> ; Other |

|                                            |                    |                                                                                                        |
|--------------------------------------------|--------------------|--------------------------------------------------------------------------------------------------------|
| <b>Severe Infection Details</b>            | Free-text          |                                                                                                        |
| <b>Malignancy Details</b>                  | Free-text          |                                                                                                        |
| <b>Pregnancy Details</b>                   | <b>Categorical</b> | <b>Not on Biologic; On Biologic with-held during Pregnancy; On Biologic continued during Pregnancy</b> |
| <b>Other Serious Medical Event Details</b> | Free-text          |                                                                                                        |
| <b>Further Details</b>                     | Free-text          |                                                                                                        |
| <b>Patient Status</b>                      | Categorical        | Actively managed; Discharged; Lost to follow up; Died; Transferred to other centre                     |
| <b>Spirometry</b>                          |                    |                                                                                                        |
| <b>Predicted FEV1 (L)</b>                  | Numerical          | <i>Calculated dependent field</i>                                                                      |
| <b>Pre-BD FEV1 (L)</b>                     | Numerical          |                                                                                                        |
| <b>Pre-BD FEV1 (% Predicted)</b>           | Numerical          |                                                                                                        |
| <b>Post-BD FEV1 (L)</b>                    | Numerical          |                                                                                                        |
| <b>Post -BD FEV1 (% Predicted)</b>         | Numerical          |                                                                                                        |
| <b>Predicted FVC (L)</b>                   | Numerical          | <i>Calculated dependent field</i>                                                                      |
| <b>Pre-BD FVC (L)</b>                      | Numerical          |                                                                                                        |
| <b>Pre-BD FVC (% Predicted)</b>            | Numerical          |                                                                                                        |
| <b>Post-BD FVC (L)</b>                     | Numerical          |                                                                                                        |
| <b>Post-BD FVC (% Predicted)</b>           | Numerical          |                                                                                                        |
| <b>Pre-BD FEV1/FVC</b>                     | Numerical          |                                                                                                        |
| <b>Post-BD FEV1/FVC</b>                    | Numerical          |                                                                                                        |
| <b>FeNO (ppb)</b>                          | Numerical          |                                                                                                        |
| <b>Blood Eosinophil Count (N/109L)</b>     | Numerical          |                                                                                                        |
| <b>Bone Density</b>                        |                    |                                                                                                        |
| <b>Date Of Bone Densitometry</b>           | Date               |                                                                                                        |
| <b>Spinal Bone Density (T-Score)</b>       | Numerical          |                                                                                                        |
| <b>Femoral Neck Bone Density (T-Score)</b> | Numerical          |                                                                                                        |

| <b>Asthma Control Questionnaire</b> |             |                                                                                                                                                                                                                                               |
|-------------------------------------|-------------|-----------------------------------------------------------------------------------------------------------------------------------------------------------------------------------------------------------------------------------------------|
| <b>ACQ1 Woken at Night</b>          | Categorical | Never; Hardly ever; A few times; Several times; Many times; A great many times; Unable to sleep because of asthma                                                                                                                             |
| <b>ACQ2 Symptoms in Morning</b>     | Categorical | No symptoms; Very mild symptoms; Mild symptoms; Moderate symptoms; Quite severe symptoms; Severe symptoms; Very severe symptoms                                                                                                               |
| <b>ACQ3 Limited in Activities</b>   | Categorical | Not limited at all; Very slightly limited; Slightly limited; Moderately limited; Very limited; Extremely limited; Totally limited                                                                                                             |
| <b>ACQ4 Shortness of Breath</b>     | Categorical | None; A very little; A little; A moderate amount; Quite a lot; A great deal; A very great deal                                                                                                                                                |
| <b>ACQ5 Wheezing</b>                | Categorical | Never; Hardly any of the time; A little of the time; A moderate amount of the time; A lot of the time; Most of the time; All of the time                                                                                                      |
| <b>ACQ6 Puffs of SABA</b>           | Categorical | None; 1 - 2 puffs/inhalations most days; 3 - 4 puffs/inhalations most days; 5 - 8 puffs/inhalations most days; 9 - 12 puffs/inhalations most days; 13 - 16 puffs/inhalations most days; More than 16 puffs/inhalations most days              |
| <b>ACQ7 FEV1</b>                    | Categorical | > 95% predicted; 95 - 90%; 89 - 80%; 79 - 70%; 69 - 60%; 59 - 50%; < 50%                                                                                                                                                                      |
| <b>ACQ6 Score</b>                   | Numerical   | <i>Calculated dependent field</i>                                                                                                                                                                                                             |
| <b>ACQ7 Score</b>                   | Numerical   | <i>Calculated dependent field</i>                                                                                                                                                                                                             |
| <b>EuroQoL Questionnaire</b>        |             |                                                                                                                                                                                                                                               |
| <b>EuroQoL Mobility</b>             | Categorical | I have no problems in walking about; I have slight problems in walking about; I have moderate problems in walking about; I have severe problems in walking about; I am unable to walk about                                                   |
| <b>EuroQoL Self-care</b>            | Categorical | I have no problems washing or dressing myself; I have slight problems washing or dressing myself; I have moderate problems washing or dressing myself; I have severe problems washing or dressing myself; I am unable to wash or dress myself |
| <b>EuroQoL Usual Activities</b>     | Categorical | I have no problems doing my usual activities; I have slight problems doing my usual activities; I have moderate problems doing my usual activities; I                                                                                         |

|                                                                                |             |                                                                                                                                                                                  |
|--------------------------------------------------------------------------------|-------------|----------------------------------------------------------------------------------------------------------------------------------------------------------------------------------|
|                                                                                |             | have severe problems doing my usual activities; I am unable to do my usual activities                                                                                            |
| <b>EuroQoL Pain / Discomfort</b>                                               | Categorical | I have no pain or discomfort; I have slight pain or discomfort; I have moderate pain or discomfort; I have severe pain or discomfort; I have extreme pain or discomfort          |
| <b>EuroQoL Anxiety / Depression</b>                                            | Categorical | I am not anxious or depressed; I am slightly anxious or depressed; I am moderately anxious or depressed; I am severely anxious or depressed; I am extremely anxious or depressed |
| <b>EuroQoL Health Scale</b>                                                    | Numerical   |                                                                                                                                                                                  |
| <b>Mini-AQLQ Questionnaire</b>                                                 |             |                                                                                                                                                                                  |
| <b>Feel SHORT OF BREATH as a result of your asthma</b>                         | Categorical | <b>All of the Time; Most of the Time; A Good Bit of the Time; Some of the Time; A Little of the Time; Hardly Any of the Time; None of the Time</b>                               |
| <b>Feel bothered by or have to AVOID DUST in the environment</b>               | Categorical | <b>All of the Time; Most of the Time; A Good Bit of the Time; Some of the Time; A Little of the Time; Hardly Any of the Time; None of the Time</b>                               |
| <b>Feel FRUSTRATED as a result of your asthma</b>                              | Categorical | <b>All of the Time; Most of the Time; A Good Bit of the Time; Some of the Time; A Little of the Time; Hardly Any of the Time; None of the Time</b>                               |
| <b>Feel bothered by COUGHING</b>                                               | Categorical | <b>All of the Time; Most of the Time; A Good Bit of the Time; Some of the Time; A Little of the Time; Hardly Any of the Time; None of the Time</b>                               |
| <b>Feel AFRAID OF NOT HAVING YOUR ASTHMA MEDICATION AVAILABLE</b>              | Categorical | <b>All of the Time; Most of the Time; A Good Bit of the Time; Some of the Time; A Little of the Time; Hardly Any of the Time; None of the Time</b>                               |
| <b>Experience a feeling of CHEST TIGHTNESS or CHEST HEAVINESS</b>              | Categorical | <b>All of the Time; Most of the Time; A Good Bit of the Time; Some of the Time; A Little of the Time; Hardly Any of the Time; None of the Time</b>                               |
| <b>Feel bothered by or have to AVOID CIGARETTE SMOKE in the environment</b>    | Categorical | <b>All of the Time; Most of the Time; A Good Bit of the Time; Some of the Time; A Little of the Time; Hardly Any of the Time; None of the Time</b>                               |
| <b>Have DIFFICULTY GETTING A GOOD NIGHT'S SLEEP as a result of your asthma</b> | Categorical | <b>All of the Time; Most of the Time; A Good Bit of the Time; Some of the Time; A Little of the Time; Hardly Any of the Time; None of the Time</b>                               |
| <b>Feel CONCERNED ABOUT HAVING ASTHMA</b>                                      | Categorical | <b>All of the Time; Most of the Time; A Good Bit of the Time; Some of the Time; A Little of the Time; Hardly Any of the Time; None of the Time</b>                               |
| <b>Experience a WHEEZE in your chest</b>                                       | Categorical | <b>All of the Time; Most of the Time; A Good Bit of the Time; Some of the Time; A Little of the Time; Hardly Any of the Time; None of the Time</b>                               |

|                                                                                                    |                    |                                                                                                                                                    |
|----------------------------------------------------------------------------------------------------|--------------------|----------------------------------------------------------------------------------------------------------------------------------------------------|
| <b>Feel bothered by or have to AVOID going outside because of WEATHER OR AIR</b>                   | <b>Categorical</b> | <b>All of the Time; Most of the Time; A Good Bit of the Time; Some of the Time; A Little of the Time; Hardly Any of the Time; None of the Time</b> |
| <b>STRENUOUS ACTIVITIES (such as hurrying, exercising, running up stairs, sports)</b>              | <b>Categorical</b> | <b>Totally Limited; Extremely Limited; Very Limited; Moderate Limitation; Some Limitation; A Little Limitation; Not at all Limited</b>             |
| <b>MODERATE ACTIVITIES (such as walking, housework, gardening, shopping, climbing stairs)</b>      | <b>Categorical</b> | <b>Totally Limited; Extremely Limited; Very Limited; Moderate Limitation; Some Limitation; A Little Limitation; Not at all Limited</b>             |
| <b>SOCIAL ACTIVITIES (such as talking, playing with pets/children, visiting friends/relatives)</b> | <b>Categorical</b> | <b>Totally Limited; Extremely Limited; Very Limited; Moderate Limitation; Some Limitation; A Little Limitation; Not at all Limited</b>             |
| <b>WORK-RELATED ACTIVITIES (tasks you have do to at work)</b>                                      | <b>Categorical</b> | <b>Totally Limited; Extremely Limited; Very Limited; Moderate Limitation; Some Limitation; A Little Limitation; Not at all Limited</b>             |

<sup>a</sup> Steroid sparing medication
